# Supplementary material for: Statistical complexity of reasons for encounter in high users of out of hours primary care: analysis of a national service
Source: BMC Health Serv Res. 2019 Feb 8;19:108. doi: 10.1186/s12913-019-3938-z (PMC6368808; doi:10.1186/s12913-019-3938-z)
Supplement: Supplementary file 2 — Data 2. Formulae for calculation of statistical measures of complexity. (DOCX 13 kb) [file 12913_2019_3938_MOESM2_ESM.docx]

Additional file 2**: Formulae used for measures of complexity of sequence.**

For a sequence of consultations including N different categories; and where P*i* represents the proportion of consultations belonging to the *i*th category

If the same sequence is then converted to K different category transitions (so sequence ABBC becomes AB, BB, BC); and where P*j* represents the proportion of consultations belonging to the *j*th transition category
